# Supplementary material for: Analyzing and Decoding Natural Reach-and-Grasp Actions Using Gel, Water and Dry EEG Systems
Source: PubMed Central journal article supplement (PMC7438923; doi:10.3389/fnins.2020.00849), 2020-08-12
Supplement: Data_Sheet_1.pdf [file Data_Sheet_1.pdf]

## Supplementary Material

### 1 ERDS time-frequency maps: lateralization

This paper reports grand average time-frequency maps for the three different recording systems and the two reach-and-grasp (palmar and lateral grasp) movement conditions, specifically showing the event-related (de)synchronization (ERD/S) using a specific reference interval of [-2 -1] s. In the results section we have provided a qualitative analysis of the ERDs and its lateralization, i.e., the difference in desynchronization between contralateral and ipsilateral motor areas.

We below provide a quantitative analysis of the lateralization that measures the difference in ERD between C3 and C4 sensors (Figure S1). First, we determined three frequency regions of interest: alpha ( $\mu$ , 8-12 Hz), low beta (16-24 Hz) and high beta (24-30 Hz). For each participant and electrode, the mean ERD value was calculated for every region of interest in the movement interval of [0 1.5] s relative to the movement onset. Finally, for each participant, we calculated the lateralization as the difference between the ERD values in C3 and C4.

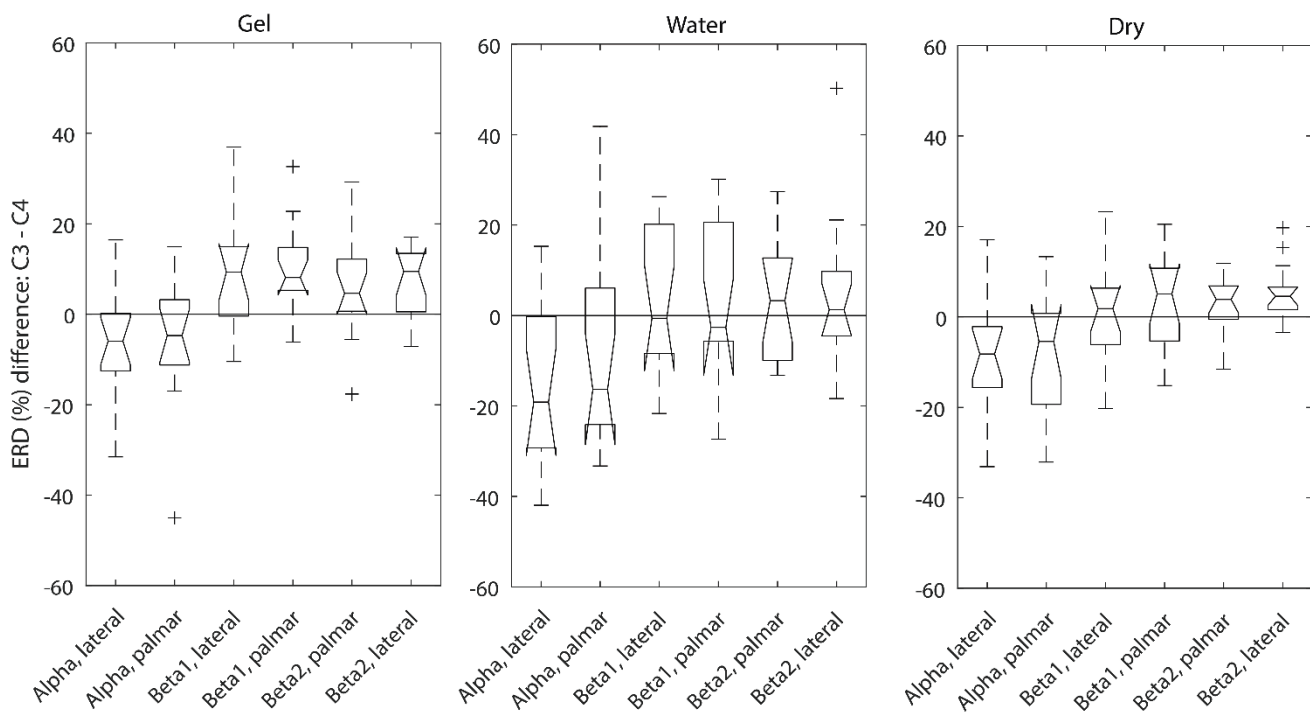

**Figure S1: ERD lateralization in the three recordings.** Box-plots of the ERD difference between C3 and C4. Positive values indicate a stronger contralateral desynchronization (also hotter colors in the time-frequency maps), whereas negative values indicate a stronger ipsilateral desynchronization.

In summary, a stronger ipsilateral ERD can be observed in alpha ( $\mu$ ) for the three recordings and movement conditions. Regarding beta lateralization, gel-based recordings show a contralateral lateralization, water-based recordings do not show a lateralization, and dry electrodes show a contralateral lateralization specifically in beta2.

## 2 Multiclass single-trial classification with reduced channels over the sensorimotor cortex

This section reports the gel- and water-based electrodes results of the multiclass single-trial classification when only using a subset of 11 channels covering the sensorimotor cortex, specifically those electrode positions of the dry-electrodes headset (EEG-Hero™): FC3, FCz, FC3, C3, C1, Cz, C2, C4, CP3, CPz, CP4.

**Table S1: Participant-specific classification results of the gel-based recordings with reduced channels.** Columns 2 to 4 show peak performance (%), standard deviation (%) and time of occurrence (s) with respect to the movement onset for the calibration set. Columns 5-7 show the same for the test set.

| #          | Calibration set |            |            | Test set    |            |            |
|------------|-----------------|------------|------------|-------------|------------|------------|
|            | Peak (%)        | STD (%)    | Time (s)   | Peak (%)    | STD (%)    | Time (s)   |
| G01        | 66.3            | 7.5        | 1.6        | 59.5        | 8.3        | 1.6        |
| G02        | 58.5            | 9.6        | 1.0        | 52.6        | 5.7        | 1.1        |
| G03        | 58.1            | 8.1        | 2.1        | 51.2        | 9.0        | 1.9        |
| G04        | 76.2            | 6.8        | 0.8        | 63.7        | 9.9        | 0.8        |
| G05        | 62.0            | 9.1        | 1.3        | 54.5        | 7.4        | -1.6       |
| G06        | 57.6            | 8.9        | 0.9        | 46.3        | 5.8        | -1.7       |
| G07        | 45.9            | 9.1        | 0.7        | 49.4        | 5.6        | 0.6        |
| G08        | 65.4            | 7.1        | 1.1        | 80.0        | 12.4       | 1.2        |
| G09        | 72.3            | 7.0        | 0.8        | 58.5        | 7.3        | 0.8        |
| G10        | 64.0            | 8.2        | 0.9        | 59.5        | 7.2        | 1.0        |
| G11        | 53.7            | 9.1        | 0.6        | 52.5        | 6.4        | 0.6        |
| G12        | 60.1            | 8.7        | 1.7        | 56.1        | 9.1        | 1.8        |
| G13        | 51.9            | 8.0        | 0.3        | 58.5        | 8.2        | 0.3        |
| G14        | 54.9            | 8.9        | 0.4        | 52.8        | 6.1        | 0.5        |
| G15        | 63.3            | 8.1        | 0.8        | 66.3        | 8.9        | 0.9        |
| <b>AVG</b> | <b>60.7</b>     | <b>8.3</b> | <b>1.0</b> | <b>57.4</b> | <b>7.8</b> | <b>0.7</b> |

**Table S2: Participant-specific classification results of the water-based recordings with reduced channels.** Columns 2 to 4 show peak performance (%), standard deviation (%) and time of occurrence (s) with respect to the movement onset for the calibration set. Columns 5-7 show the same for the test set.

| #          | Calibration set |            |            | Test set    |            |            |
|------------|-----------------|------------|------------|-------------|------------|------------|
|            | Peak (%)        | STD (%)    | Time (s)   | Peak (%)    | STD (%)    | Time (s)   |
| V01        | 61.6            | 9.7        | 0.9        | 58.2        | 11.2       | 0.8        |
| V02        | 67.1            | 7.3        | 0.6        | 67.9        | 8.2        | 0.8        |
| V03        | 62.1            | 6.4        | 0.9        | 53.6        | 6.5        | 1.0        |
| V04        | 58.0            | 8.0        | 0.3        | 50.6        | 6.9        | 0.4        |
| V05        | 59.4            | 7.0        | 0.9        | 51.8        | 8.5        | 0.9        |
| V06        | 73.3            | 7.8        | 0.9        | 76.3        | 11.8       | 1.0        |
| V07        | 64.0            | 6.9        | 0.9        | 59.5        | 8.0        | 0.8        |
| V08        | 72.9            | 7.7        | 1.2        | 52.0        | 6.0        | 0.7        |
| V09        | 61.1            | 7.8        | 0.8        | 63.9        | 10.3       | 0.9        |
| V10        | 61.2            | 9.6        | 0.8        | 58.0        | 8.1        | 0.9        |
| V11        | 57.0            | 9.0        | 0.1        | 51.9        | 7.5        | 0.1        |
| V12        | 55.7            | 7.6        | -0.5       | 48.8        | 8.5        | -0.3       |
| V13        | 60.4            | 8.0        | 0.3        | 53.7        | 6.8        | 0.3        |
| V14        | 58.5            | 8.6        | 1.0        | 56.4        | 9.7        | 0.6        |
| V15        | 60.1            | 8.7        | 0.8        | 60.5        | 8.0        | 0.9        |
| <b>AVG</b> | <b>62.2</b>     | <b>8.0</b> | <b>0.7</b> | <b>57.5</b> | <b>8.4</b> | <b>0.7</b> |
